# Supplementary material for: Bubble-template synthesis of WO3·0.5H2O hollow spheres as a high-activity catalyst for catalytic oxidation of benzyl alcohol to benzaldehyde
Source: Royal Society of Chemistry journal article supplement (doi:10.1039/c8ce01999a), 2019-01-01
Supplement: c8ce01999a1.pdf [file c8ce01999a1.pdf]

## Supporting Information

### **Bubble-template synthesis of $\text{WO}_3 \cdot 0.5\text{H}_2\text{O}$ hollow spheres as a high-activity catalyst for catalytic oxidation of benzyl alcohol to benzaldehyde**

Huixiang Wang,<sup>a</sup> Xiaobo Ren,<sup>ad</sup> Zhong Liu,<sup>bc</sup> Dong Jiang\*<sup>a</sup> and Baoliang

Lv<sup>a</sup>

<sup>a</sup> State Key Laboratory of Coal Conversion, Institute of Coal Chemistry, Chinese Academy of Sciences, Taiyuan 030001, China.

\*E-mail: [jdred@sxicc.ac.cn](mailto:jdred@sxicc.ac.cn); [lbl604@sxicc.ac.cn](mailto:lbl604@sxicc.ac.cn)

<sup>b</sup> Key Laboratory of Comprehensive and Highly Efficient Utilization of Salt Lake Resources, Qinghai Institute of Salt Lakes, Chinese Academy of Sciences, Xining 810008, China.

<sup>c</sup> Key Laboratory of Salt Lake Resources Chemistry of Qinghai Province, Xining 810008, China.

<sup>d</sup> University of Chinese Academy of Sciences, Beijing 100049, China.

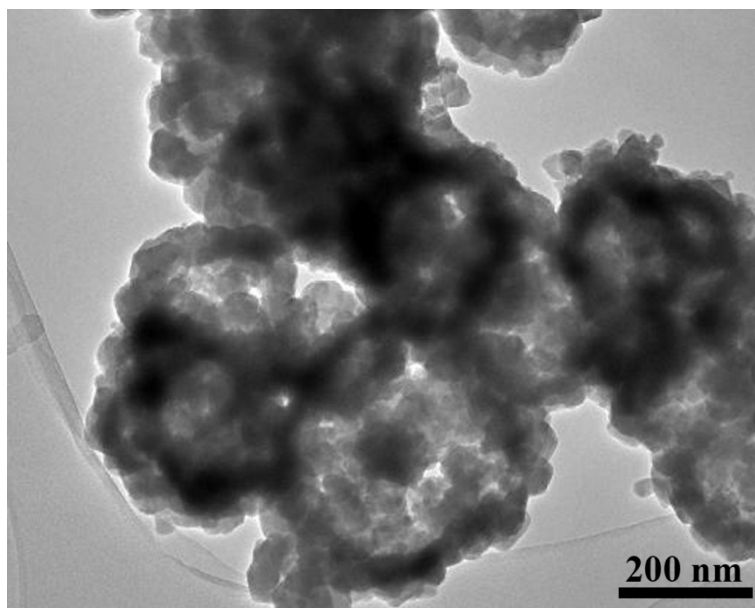

**Fig. S1** The TEM image of  $\text{WO}_3 \cdot 0.5\text{H}_2\text{O}$  hollow spheres obtained at 45 mM urea before 300 °C calcination in air atmosphere.

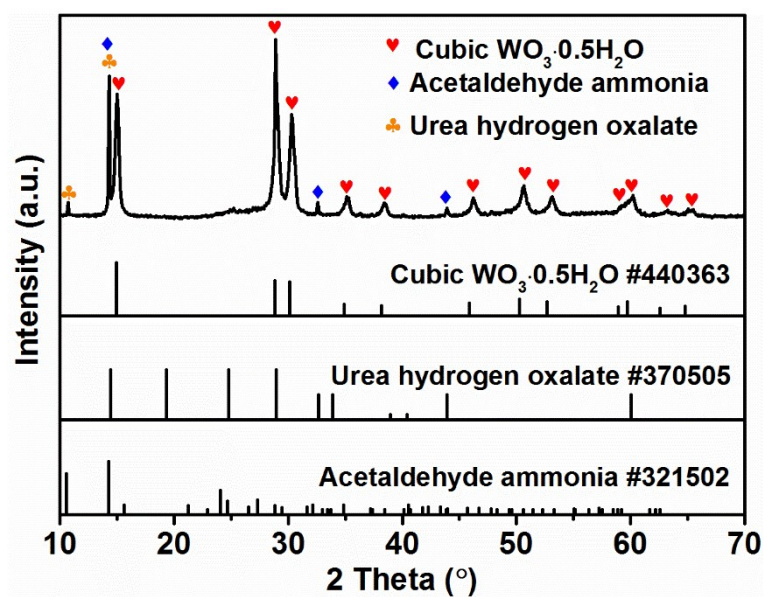

**Fig. S2** The XRD pattern of  $\text{WO}_3 \cdot 0.5\text{H}_2\text{O}$  hollow spheres without calcination at 300°C in air atmosphere.

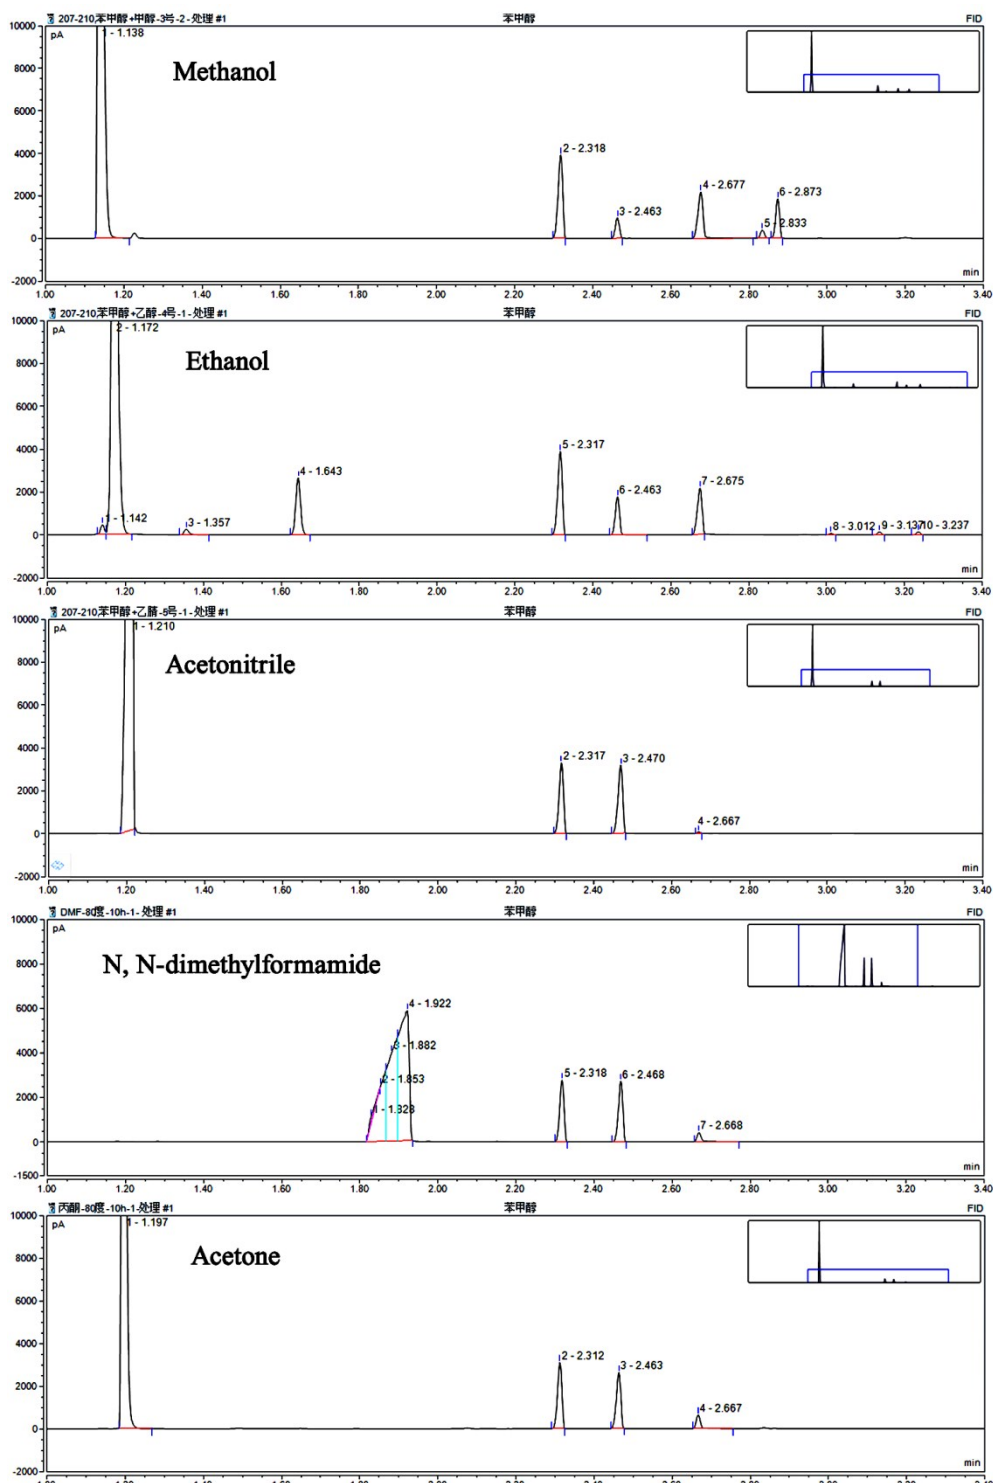

**Fig. S3** Catalytic oxidation of benzyl alcohol on  $\text{WO}_3 \cdot 0.5\text{H}_2\text{O}$  hollow spheres with different solvents.

### Retention time

1.138 min: Methanol; 1.172 min: Ethanol; 1.197 min: Acetone; 1.210 min: Acetonitrile; 1.357 min: Ethyl acetate; 1.643 min: Acetal; 2.318 min: Anisole; 2.463 min: Benzaldehyde; 2.677 min: Benzyl alcohol; 2.833 min: Methyl benzoate; 2.873 min: Benzaldehyde dimethylacetal; 3.012 min: Benzoic acid; 3.137 min: Ethyl benzoate; 3.237 min: 3-Benzyloxy 2-butanol.

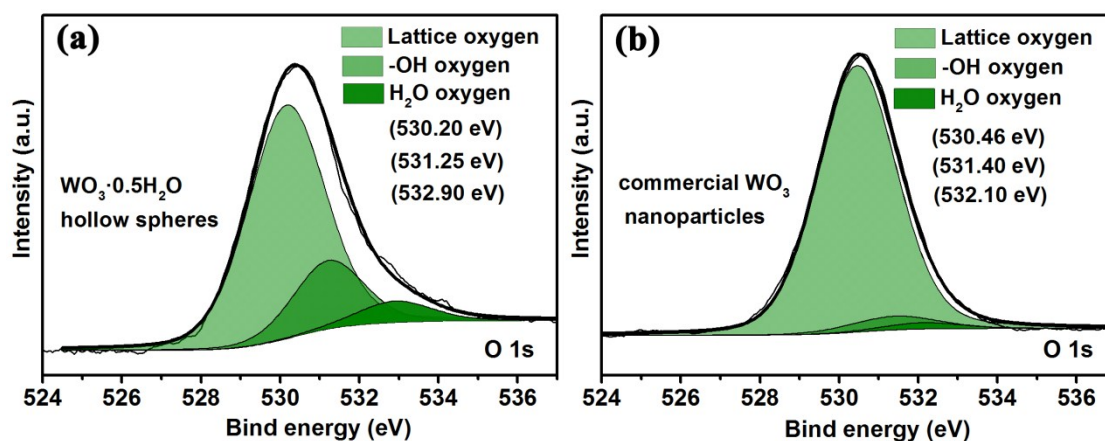

Fig. S4 The O 1s binding energy of  $\text{WO}_3 \cdot 0.5\text{H}_2\text{O}$  hollow spheres (a) and c- $\text{WO}_3$  (b).

Tab. S1 The performance comparison of  $\text{WO}_3 \cdot 0.5\text{H}_2\text{O}$  hollow spheres and reported catalysts in catalytic oxidation of benzyl alcohol to benzaldehyde

| samples                                                  | BET<br>( $\text{m}^2 \cdot \text{g}^{-1}$ ) | Catalyst<br>(mg) | BzOH<br>(mmol) | $n(\text{H}_2\text{O}_2) /$<br>$n(\text{BzOH})$ | T<br>( $^{\circ}\text{C}$ ) | t<br>(h) | Con. (%)<br>(BzOH) | Sel. (%)<br>(BzH) | TOF (BzH)<br>( $\text{mmol} \cdot \text{m}^{-2} \cdot \text{h}^{-1}$ ) | Reference        |
|----------------------------------------------------------|---------------------------------------------|------------------|----------------|-------------------------------------------------|-----------------------------|----------|--------------------|-------------------|------------------------------------------------------------------------|------------------|
| MOR-HN                                                   | 455.4                                       | 500              | 135            | 1:1                                             | 90                          | 4        | 99.9               | 99.8              | 0.148                                                                  | [1]              |
| 25ZSM(AT-0.5)                                            | 268                                         | 1000             | 99             | 1.3:1                                           | 90                          | 4        | 52.0               | 70.0              | 0.034                                                                  | [2]              |
| 20HPW/ $\text{CeO}_2$                                    | 26.0                                        | 800              | 50             | 2:1                                             | 110                         | 4        | 94.0               | 98.2              | 0.555                                                                  | [3]              |
| Cr(salen)/MCM-41                                         | 680.0                                       | 250              | 50             | 2.5:1                                           | 50                          | 4        | 52.5               | 99.0              | 0.038                                                                  | [4]              |
| $\text{Fe}_3\text{O}_4$ -AIP                             | 31.3                                        | 200              | 40             | 2:1                                             | 100                         | 1.5      | 40.0               | 85.0              | 1.448                                                                  | [5]              |
| $\text{Fe}_3\text{O}_4$ -ECH-P-3g                        | 28.0                                        | 200              | 40             | 2:1                                             | 100                         | 1.5      | 39.2               | 84.8              | 1.572                                                                  | [6]              |
| Au/TS-1(0.3%)                                            | 372.0                                       | 300              | 29             | 1.3:1                                           | 80                          | 24       | 79.0               | 75.0              | 0.06                                                                   | [7]              |
| SIL- $\text{FeCl}_3$                                     | 309.1                                       | 200              | 28.8           | 4:1                                             | 90                          | 6        | 65.2               | 63.0              | 0.032                                                                  | [8]              |
| sulfated Ti-SBA-15(10)                                   | 594.0                                       | 500              | 10             | 4:1                                             | 60                          | 2        | 62.0               | 96.0              | 0.010                                                                  | [9]              |
| RHAC-CoPor                                               | 114.0                                       | 80               | 10             | 1.5:1                                           | 70                          | 5        | 97.1               | 97.7              | 0.208                                                                  | [10]             |
| $\text{Ti}(\text{SO}_4)_2/\text{GOF}$                    | 119.8                                       | 400              | 6.5            | 3:1                                             | 75                          | 4        | 91.3               | 99.0              | 0.031                                                                  | [11]             |
| $\text{WO}_3 \cdot 0.5\text{H}_2\text{O}$ hollow spheres | 13.8                                        | 30               | 2              | 3:1                                             | 80                          | 10       | 99.2               | 99.0              | <b>0.474</b>                                                           | <b>This work</b> |

●BzOH: benzyl alcohol; BzH: benzaldehyde

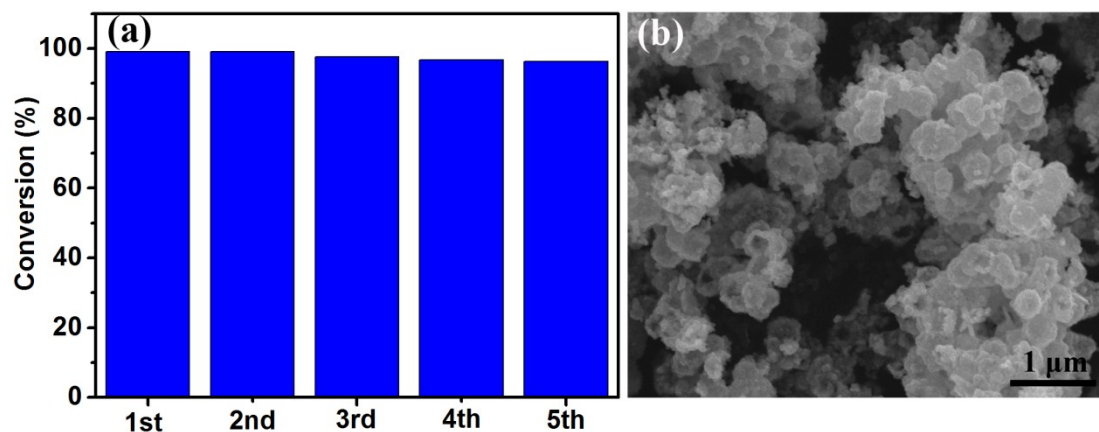

**Fig. S5** (a) The conversion of five reactions on  $\text{WO}_3 \cdot 0.5\text{H}_2\text{O}$  hollow spheres. (b) The SEM image of  $\text{WO}_3 \cdot 0.5\text{H}_2\text{O}$  hollow spheres after the fifth reaction.

### References

- [1] S. K. Saxena, N. Viswanadham and A. H. Al-Muhtaseb, *J. Porous Mater.*, 2016, 23, 1671-1678.
- [2] A. Jia, L. L. Lou, C. Zhang, Y. Zhang and S. Liu, *J. Mol. Catal. A*, 2009, 306, 123-129.
- [3] X. Han, Y. Kuang, C. Xiong, X. Tang, Q. Chen, K. Wang, C. T. Hung, L. L. Liu and S. B. Liu, *J. Braz. Chem. Soc.*, 2018, 29, 88-98.
- [4] X. Wang, G. Wu, J. Li, F. Xiao, W. Wei and Y. Sun, *Chin. J. Catal.*, 2007, 28, 1101-1106.
- [5] L. Xiong, R. Chen and F. Chen, *RSC Adv.*, 2016, 6, 101048-101060.
- [6] S. Xiao, C. Zhang, R. Chen and F. Chen, *New J. Chem.*, 2015, 39, 4924--4932.
- [7] G. Zhan, J. Huang, M. Du, D. Sun, I. Abdul-Rauf, W. Lin, Y. Hong and Q. Li, *Chem. Eng. J.*, 2012, 187, 232-238.
- [8] R. Cang, B. Lu, X. Li, R. Niu, J. Zhao and Q. Cai, *Chem. Eng. Sci.*, 2015, 137, 268-275.
- [9] R. V. Sharma, K. K. Soni and A. K. Dalai, *Catal. Commun.*, 2012, 29, 87-91.
- [10] F. Adam and W. T. Ooi, *Appl. Catal. A*, 2012, 445- 446, 252- 260.
- [11] W. Ma, Q. Tong, J. Wang, H. Yang, M. Zhang, H. Jiang, Q. Wang, Y. Liu and M. Cheng, *RSC Adv.*, 2017, 7, 6720-6723.
